# Supplementary material for: Exploring Consumer Behavior and Preferences toward White Shrimp in Taiwan
Source: MDPI journal article supplement (doi:10.3390/fishes8080391), 2023-07-27
Supplement: s1 [file s1]

Archive with 1 entries (1 files):
- fishes-2512501-supplementary.pdf
